# Supplementary material
Source: ML conference proceedings conference paper supplement (https://www.ecva.net/papers/eccv_2020/papers_ECCV/html/123520188_ECCV_2020_paper.php)
Supplement: Supplementary file 3 [file 123520188-supp.zip]

Archive with 8 entries (5 files):
- 0177-supp/
- 0177-supp/0177-supp.pdf
- __MACOSX/
- __MACOSX/0177-supp/
- __MACOSX/0177-supp/._0177-supp.pdf
- 0177-supp/0177-movie.mp4
- 0177-supp/README.txt
- __MACOSX/0177-supp/._README.txt
