# Supplementary material
Source: ML conference proceedings conference paper supplement (https://www.ecva.net/papers/eccv_2020/papers_ECCV/html/123520188_ECCV_2020_paper.php)
Supplement: Supplementary file 3 [file 123520188-supp.zip › 0177-supp/README.txt]

=====================================================================
Efficient Non-Line-of-Sight Imaging from Transient Sinograms
Supplementary Material

Marika Isogawa, Dorian Chan, Ye Yuan, Kris Kitani, Matthew O'Toole
=====================================================================

This supplementary material submission includes
- 0177-supp.pdf
- 0177-movie.mp4

The video is encoded with H.264, which is natively supported on recent Mac OS and Windows.
